# Supplementary material for: p16Ink4a and p21Cip1/Waf1 promote tumour growth by enhancing myeloid-derived suppressor cells chemotaxis
Source: PubMed Central journal article supplement (PMC5727112; doi:10.1038/s41467-017-02281-x), 2017-12-12
Supplement: 41467_2017_2281_MOESM1_ESM.pdf [file 41467_2017_2281_MOESM1_ESM.pdf]

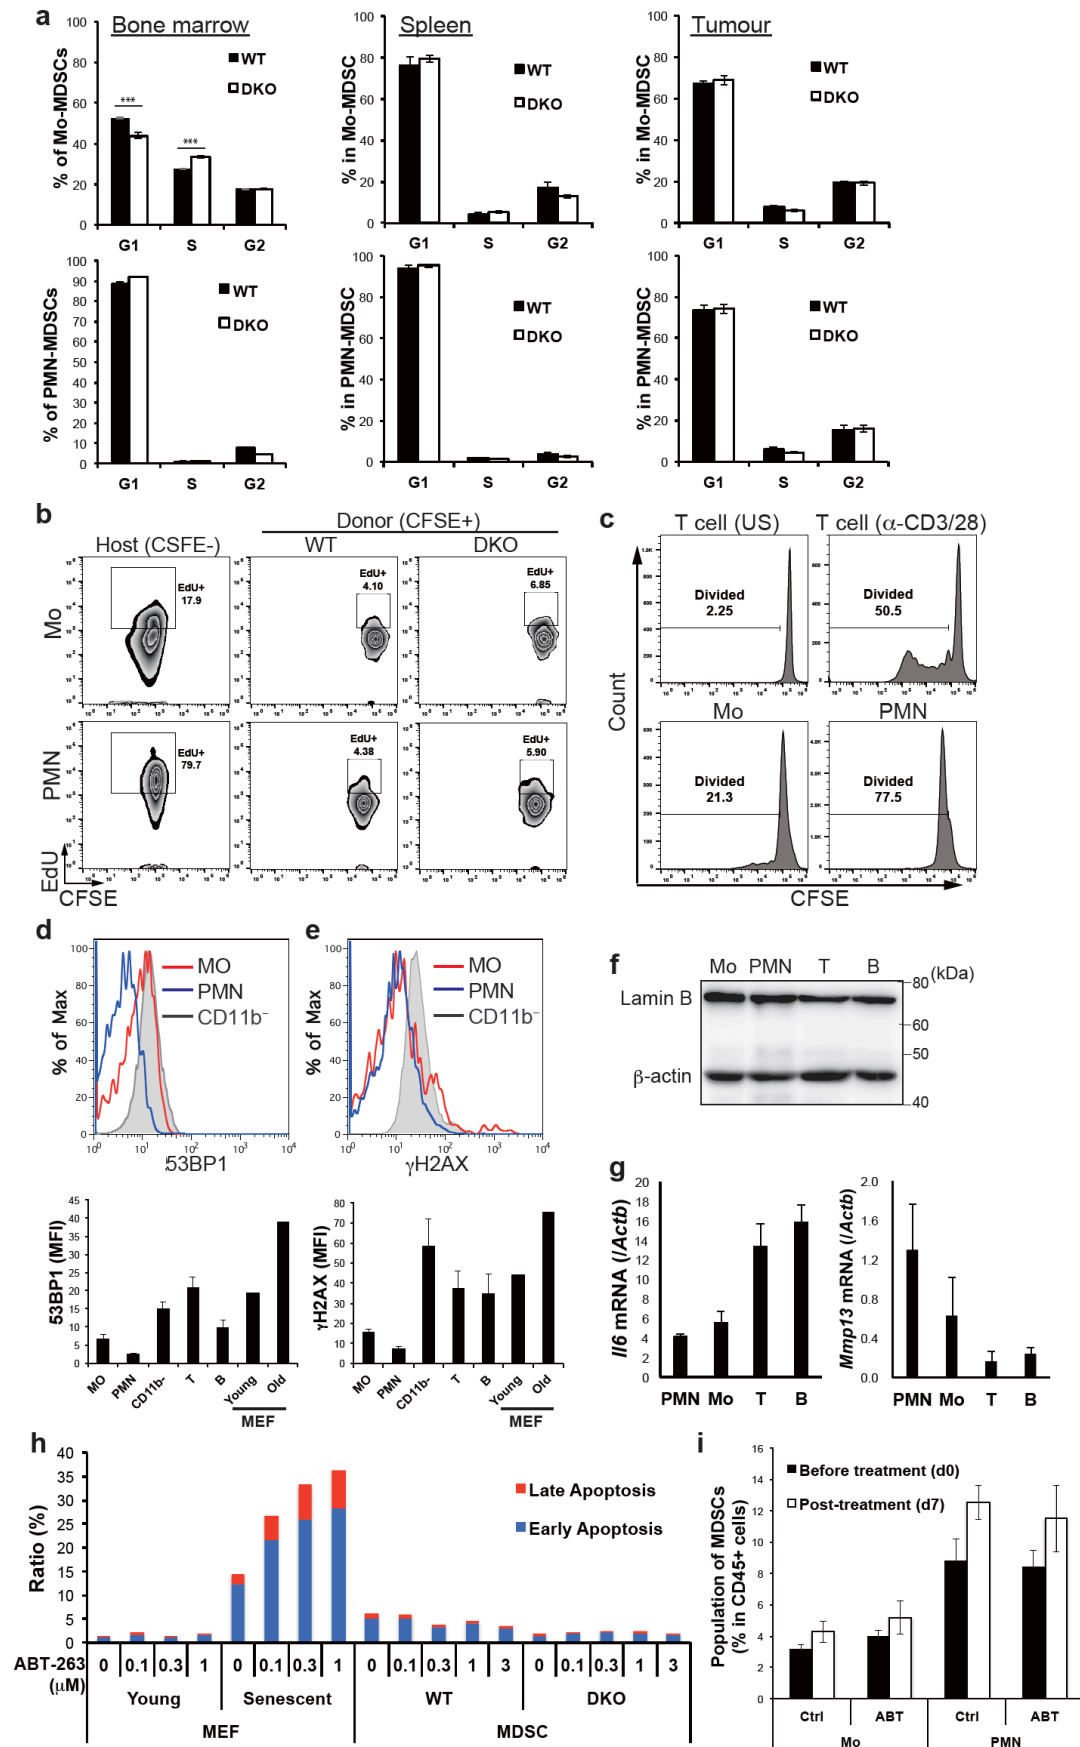

**Supplementary Figure 1 MDSCs do not exhibit senescence-associated phenotypes.** (a) Cell-cycle analysis of 4',6-diamidino-2-phenylindole (DAPI)-stained cells by flow cytometry; Mo-MDSCs and PMN-MDSCs were harvested from bone marrows (left graphs), spleens (middle graphs), and tumours (right graphs) of SCT-bearing wild-type (WT; black bars) and p16/p21-DKO (DKO; white bars) mice. (b) *In vivo* 5-ethynyl-2'-deoxyuridine (EdU) incorporation assay. Purified splenic PMN-MDSCs, Mo-MDSCs, and intratumor Mo-MDSCs were stained with carboxyfluorescein diacetate succinimidyl ester (CFSE) and injected intravenously into SCT-bearing mice. Representative flow cytometry plots of recipient Mo-MDSCs (CFSE<sup>-</sup>CD11b<sup>+</sup>Gr1<sup>int</sup>; left upper graph), PMN-MDSCs (CFSE<sup>-</sup>CD11b<sup>+</sup>Gr1<sup>hi</sup>; left lower graph), and transferred CFSE<sup>+</sup> cells harvested from spleen in WT (middle graphs) and p16/p21-DKO (right graphs) show ratio of EdU incorporation into injected cells during 3 days of exposure to EdU drinking water. (c) *In vitro* CFSE dilution assay by flow cytometry. Purified splenic PMN-MDSCs, Mo-MDSCs were cultured in 20 ng/ml GM-CSF-containing medium for 3 days. Unstimulated T cells (US) and T cells stimulated with anti-CD3/CD28 were served as negative and positive control, respectively. (d-f) Expression levels of P53-binding protein 1 (53BP1) (d) and  $\gamma$ -histone H2AX ( $\gamma$ H2AX) (e) in the indicated cell types were analysed by flow cytometry. Upper panels show representative flow cytometry plots and lower panels show average mean fluorescence intensity MFI (n = 3). Mo-MDSCs (MO), PMN-MDSCs (PMN), CD11b<sup>-</sup> cells (CD11b<sup>-</sup>), T cells (T), and B cells (B) harvested from spleens of SCT-bearing mice. Early (Young) and late (Old) passage mouse embryonic fibroblasts (MEFs) served as controls for cellular senescence. (f) Expression of Lamin B1; lysates were prepared from splenic Mo-MDSCs (Mo), PMN-MDSCs (PMN), T cells (T), and B cells (B) of WT TB mice. Immunoblots of Lamin B1 are shown;  $\beta$ -actin served as a loading control. (g) Expression of *Il6* and *Mmp13* mRNA in splenic PMN-MDSCs (PMN), Mo-MDSCs (Mo), T cells, and B cells from SCT-bearing mice (n = 3), as determined by qRT-PCR. (h) Sensitivity of BM-Mo-MDSCs (see Supplementary Fig. 8) from WT and DKO mice to a senolytic drug (ABT-263). Cells were treated with ABT-263 (0, 0.1, 0.3, 1, or 3  $\mu$ M) for 72 h and subjected to flow cytometric analysis following annexin V and 7-AAD staining; % frequencies of early apoptotic cells (annexin V-positive and 7-AAD-negative) and late apoptotic cells (annexin V-positive and 7-AAD-positive) are shown. Early passage (Young) and doxorubicin-induced senescent (Senescent) MEFs served as negative and positive controls for ABT-263-induced apoptosis, respectively. (i) Sensitivity of MDSCs in mice to ABT-263. Populations of peripheral blood Mo-MDSCs (MO) and PMN-MDSCs (PMN) in CD45<sup>+</sup> cells from mice treated with control vehicle (Ctrl) or 50 mg/kg/d ABT-263 (ABT) once daily for 7 days starting on day 21 post-SCT inoculation are shown. Samples from mice before treatment served as a control (n = 7). Data are presented as means  $\pm$  SEM. The statistical significance was determined by Student's t test; \*\*\*P < 0.001.

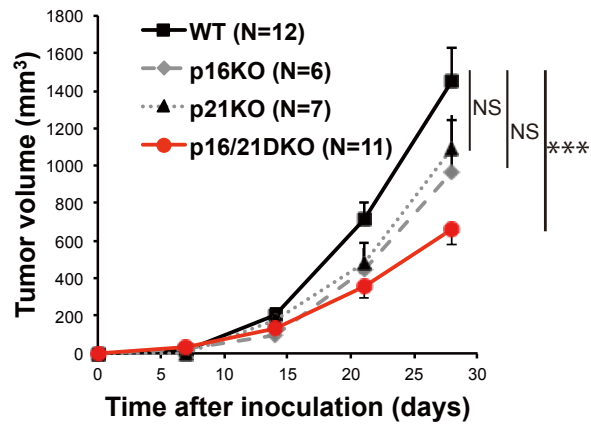

**Supplementary Figure 2 Tumour Growth is inhibited in p16/p21-DKO mice but not in p16KO or p21KO mice.** Tumour size in SCT-injected WT, p16KO, p21KO, and p16/p21-DKO mice. Data of WT and p16/p21-DKO are also shown in Figure 2a. Data are represented as the means  $\pm$  SEM. The statistical significance was determined by Student's t test; \*\*\*P < 0.001; NS, not significant.

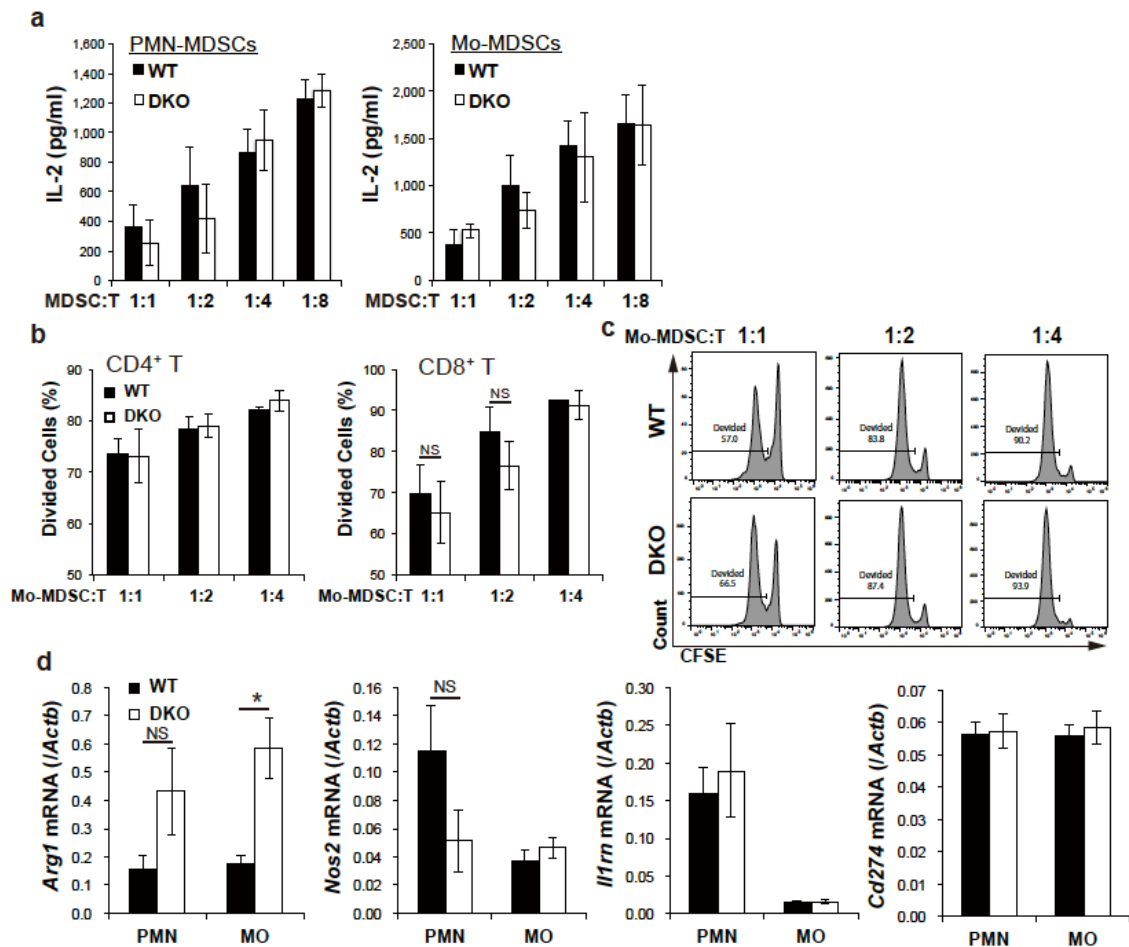

**Supplementary Figure 3 There was no significant difference in immunosuppressive ability between MDSCs from WT and those from p16/p21-DKO mice.** (a) Antigen-dependent T cell activation *in vitro*; in the presence of OVA-peptide, RF33.70 (OVA-specific T hybridoma) and DC2.4 (dendritic cell line) cells were cultured with purified PMN- (left) and Mo-MDSCs (right) from TB WT or p16/p21-DKO mice at indicated ratios. The level of IL-2 in the culture supernatant, measured by enzyme-linked immunosorbent assay, was used as an indicator of T cell activation. Data represent mean IL-2 concentration (n = 4). (b and c) Cell division analysis of CFSE-stained splenic T cells activated with anti-CD3- and anti-CD28-coated beads in the presence of purified splenic (b) and intratumoural (c) Mo-MDSCs from WT or p16/p21-DKO mice (n = 4). Left and right graphs show mean populations of divided CD4<sup>+</sup> and CD8<sup>+</sup> cells, respectively. (d) Expression of *Arg1*, *Nos2*, *Il1rn* (IL1R antagonist), and *Cd274* (PD-1L) mRNA in PMN- and Mo-MDSCs from WT or p16/p21-DKO mice (n = 5–6), as determined by qRT-PCR. Data are represented as the means ± SEM. The statistical significance was determined by Student's t test; \*P < 0.05; NS, not significant.

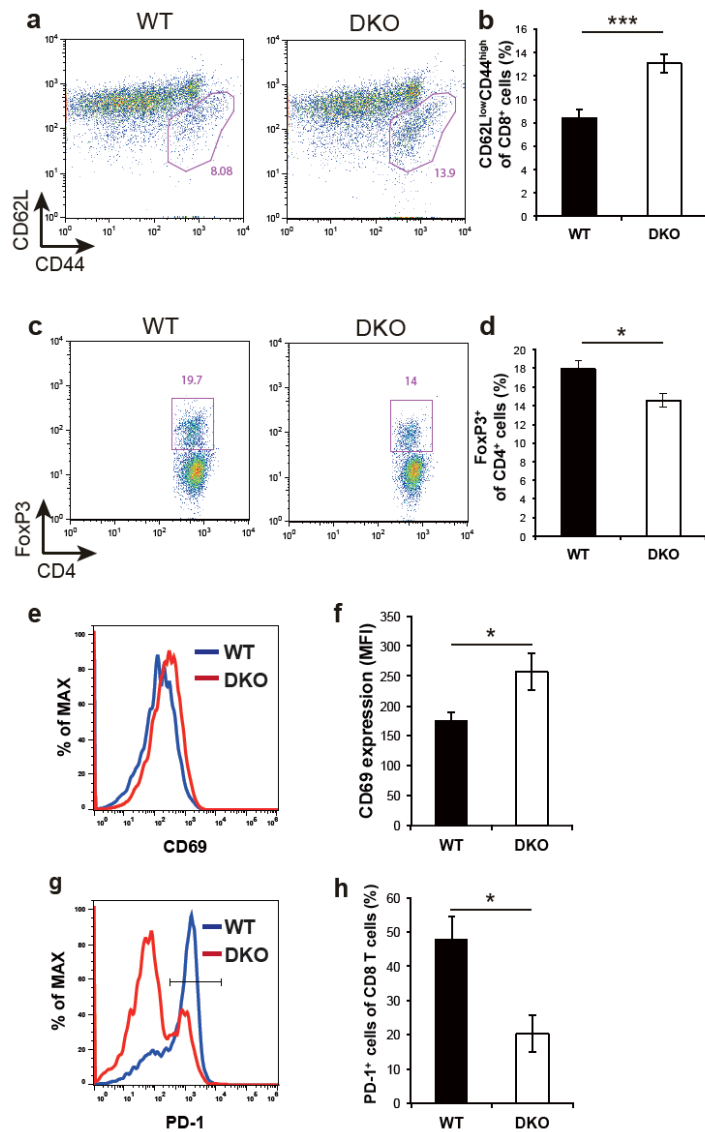

**Supplementary Figure 4 Decreased number of intratumoral Mo-MDSCs leads to attenuation of local immunosuppression.**

(a) Representative flow cytometry plots of CD8<sup>+</sup>-gated cells in draining lymph nodes of WT and p16/p21-DKO mice 3 weeks after SCT cell injection. Cells were labelled with CD8, CD44, and CD62L antibodies. (b) Mean populations of CD44<sup>high</sup>CD62<sup>low</sup> cells in the CD8<sup>+</sup> gated cells shown in (a) (n = 6); (c) Representative flow cytometry plots of CD3<sup>+</sup>CD4<sup>+</sup>-gated cells in draining lymph nodes from WT and p16/p21-DKO mice 3 weeks after SCT cell injection. Cells were labelled with CD3, CD4, and FoxP3 antibodies. (d) Mean number of FoxP3<sup>+</sup> cells in the CD4<sup>+</sup> population shown in (c) (n = 6). (e and f) Expression of CD69 in CD8<sup>+</sup>-gated cells in intratumoural cells. Representative histogram (e) and average of the MFI (f) (n = 4). (g and h) Population of PD-1<sup>+</sup> cells in CD8<sup>+</sup>-gated cells in intratumoural cells. Representative histogram (g) and mean (h) (n = 4); data are represented as means ± SEM. The statistical significance was determined by Student's t test; \*P < 0.05 and \*\*\*P < 0.001.

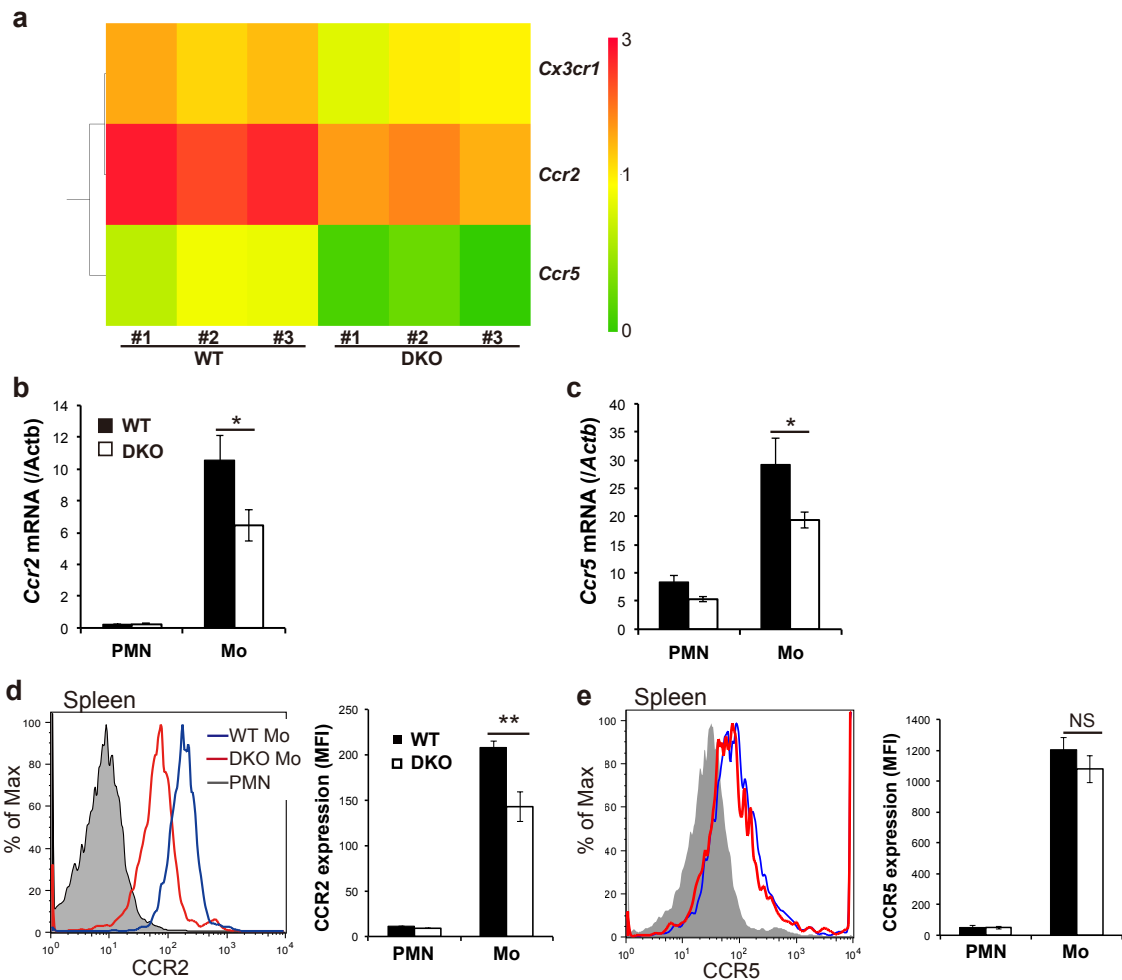

**Supplementary Figure 5 Difference in CCR2 and CCR5 expression between WT and p16/p21-DKO Mo-MDSCs.** (a) List of genes selected in Figure 3a; mosaic tile representation of each gene is also shown with intensity gradients indicating the mean value of the expression level (log<sub>2</sub> ratio). (b and c) Expression of *Ccr2* (b) and *Ccr5* (c) mRNA was measured by qRT-PCR. Representative flow cytometry histograms showing CCR2 (d) and CCR5 (e) expression in PMN- and Mo-MDSCs in spleens from WT and p16/p21-DKO mice 3 weeks after SCT cell injection (n = 5). Graphs are presented as the mean ± SEM. The statistical significance was determined by Student's t test; \*P < 0.05 and \*\*P < 0.01; NS, not significant.

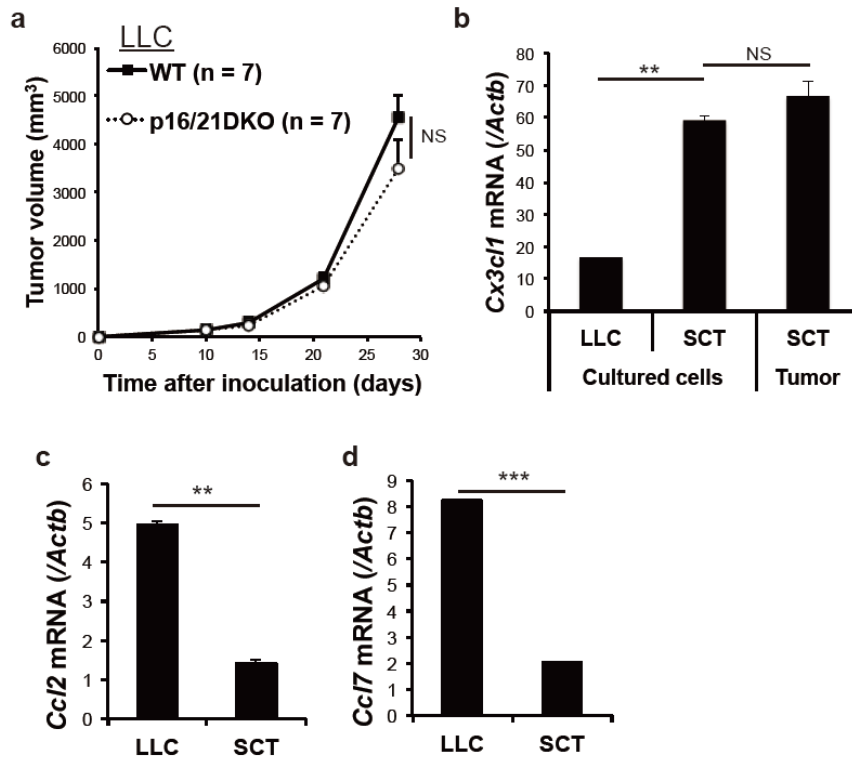

**Supplementary Figure 6 Cancer specificity for p16/p21-dependent tumour promotion and CX3CL1 expression in tumour cells.** (a) Growth curves of LLC in WT and p16/p21-DKO mice. (b) *Cx3cl1* mRNA expression in the LLC, SCT, and tumour derived from SCT inoculation *in vivo*, as determined by qRT-PCR. (c,d) mRNA level of *Ccl2* (c) and *Ccl7* (d) in LLC and SCT were measured by qRT-PCR. Graphs show the mean  $\pm$  SEM. The statistical significance was determined by Student's t test; \*\*P < 0.01 and \*\*\*P < 0.001; NS, not significant.

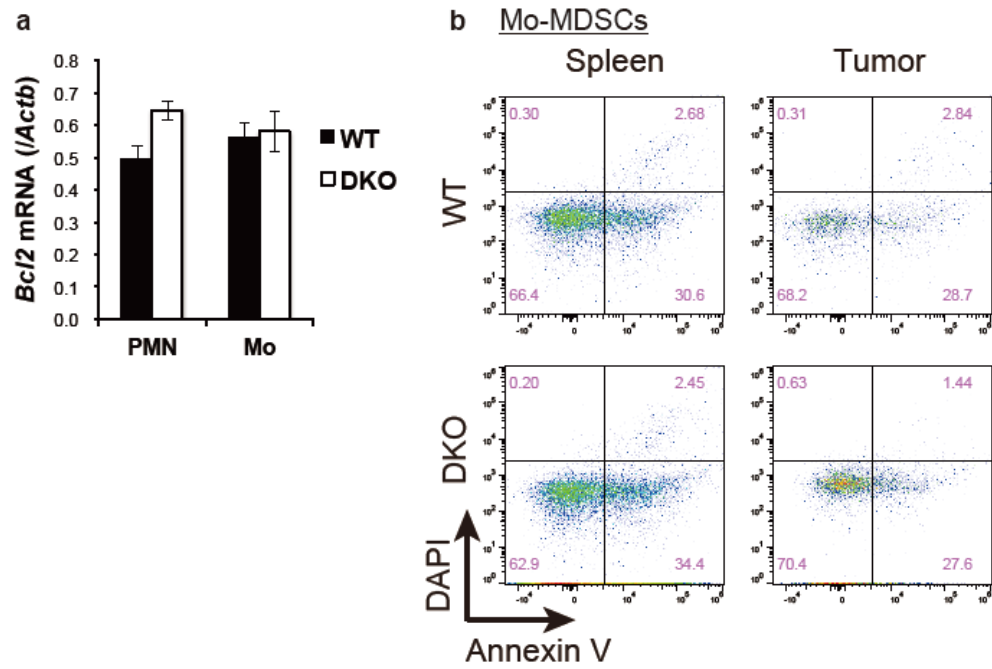

**Supplementary Figure 7 Apoptosis in MDSCs.** (a) Expression of *Bcl2* mRNA was measured by qRT-PCR. (b) Representative flow cytometry plots of splenic (left) and intratumoral (right) Mo-MDSCs (CD11b<sup>+</sup>Ly6C<sup>hi</sup>Ly6G<sup>-</sup>) following annexin V and DAPI staining. Graphs show the mean  $\pm$  SEM.



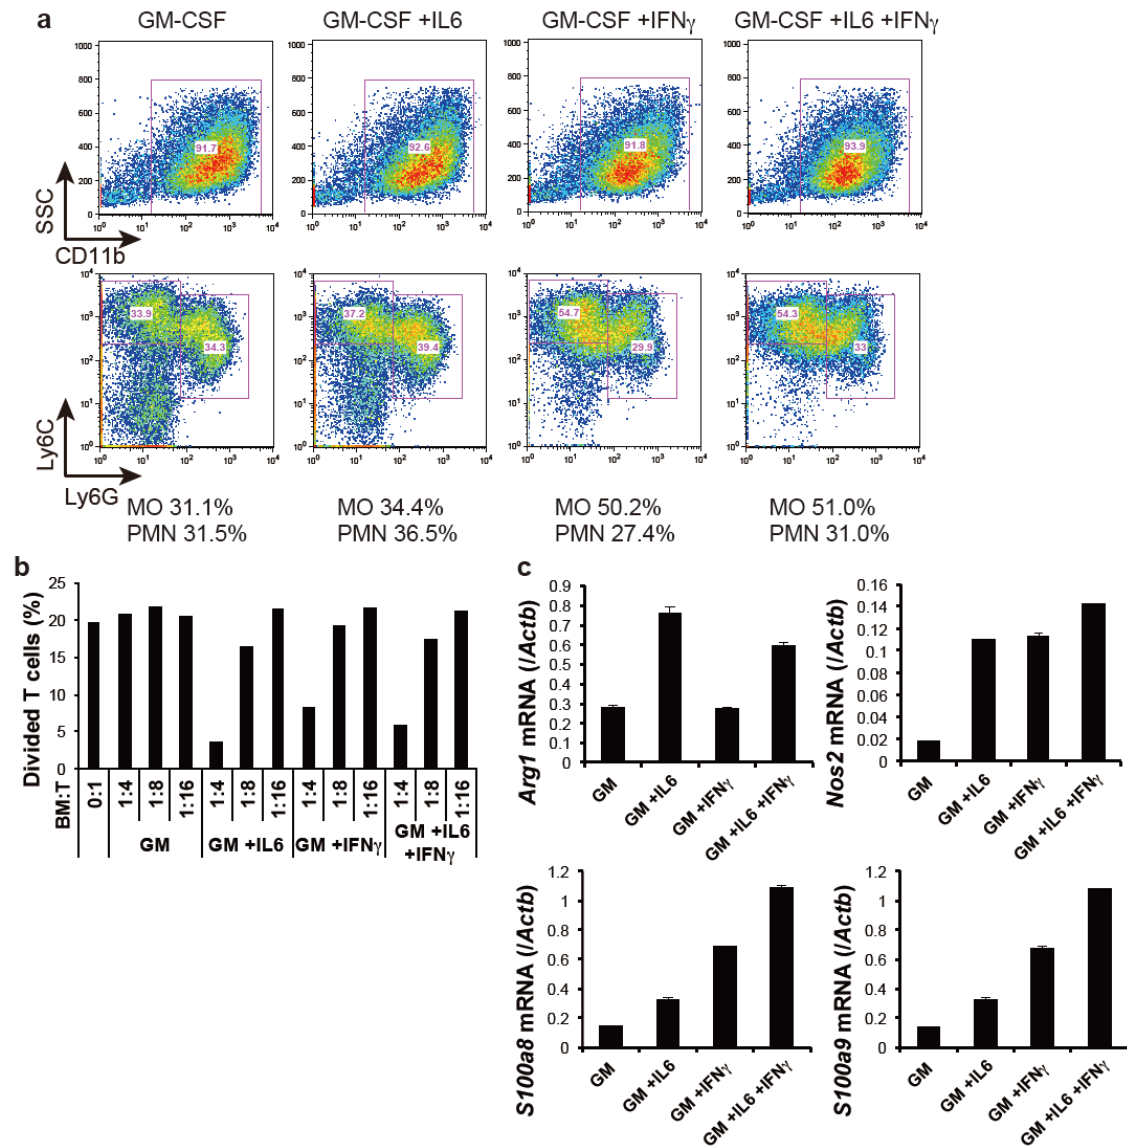

**Supplementary Figure 8 IFN- $\gamma$  enhanced differentiation of Mo-MDSCs from BM cells.** (a) Representative flow cytometry plots of BM cells under the indicated culture conditions; cells were labelled with CD11b, Ly6C, and Ly6G antibodies. CD11b<sup>+</sup> cells (upper panels) and Mo-MDSC and PMN-MDSC populations among CD11b<sup>+</sup> cells (lower panels) were detected. Percentages of Mo-MDSC and PMN-MDSC populations within the total number of cells are indicated. (b) Cell division analysis of CFSE-stained splenic T cells activated with anti-CD3- and anti-CD28-coated beads in the presence of BM-derived cells under indicated culture conditions and BM cell:T cell ratios (c) *Arg1*, *Nos2*, *S100a8*, and *S100a9* mRNA expression in BM-derived cells under the indicated culture conditions was determined by qRT-PCR. Data are representative of three biological replicates. Graphs show the means  $\pm$  SEM. Data are representative of three independent experiments.

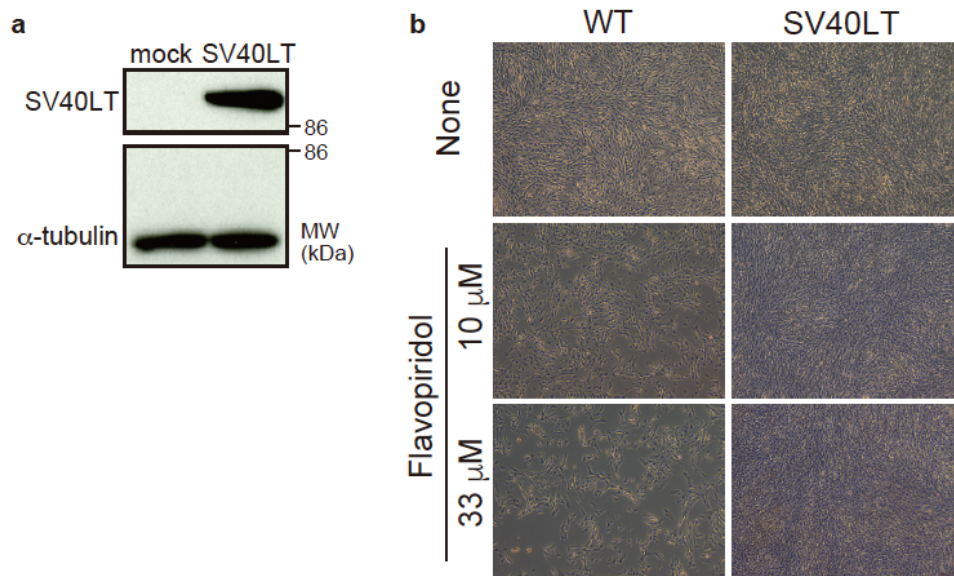

**Supplementary Figure 9 SV40LT-expressing SCT cells are resistant to flavopiridol.** (a) Expression of SV40 large T antigen (SV40LT); lysates were prepared from mock- and SV40LT-transduced SCT cells. Immunoblots of SV40LT are shown;  $\alpha$ -tubulin served as a loading control. (b) Representative images of SCTs and SV40LT-expressing SCTs treated with flavopiridol (33 or 10  $\mu$ M) or DMSO control (None).

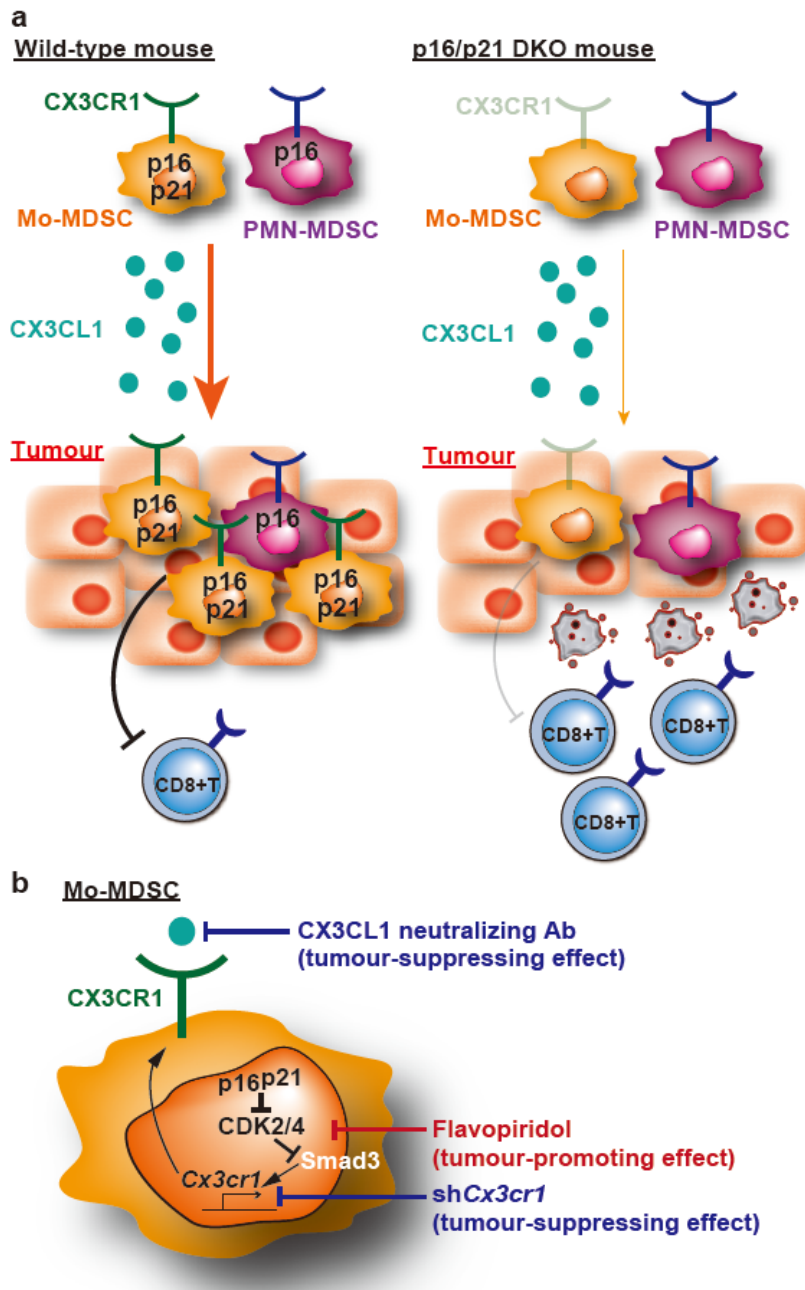

**Supplementary Figure 10 Tumour-promoting mechanism of p16<sup>Ink4a</sup> and p21<sup>Cip1/Waf1</sup> in Mo-MDSCs.**

(a) Mo-MDSCs express both p16<sup>Ink4a</sup> and p21<sup>Cip1/Waf1</sup>, and migrate into CX3CL1-expressing tumours. However, loss of p16/p21 decreases CX3CR1-mediated infiltration of Mo-MDSCs into the tumour, resulting in attenuation of immunosuppressive ability *in vivo*. (b) Molecular mechanism of p16/p21-mediated CX3CR1 expression in Mo-MDSCs and experimentally demonstrated effects of inhibition of the CX3CL1/CX3CR1 axis and CDK on tumour progression.
